# Supplementary material
Source: ML conference proceedings conference paper supplement (https://www.ecva.net/papers/eccv_2020/papers_ECCV/html/123480477_ECCV_2020_paper.php)
Supplement: Supplementary file 1 [file 123480477-supp.zip]

# Learning to plan with uncertain topological maps

Edward Beeching<sup>1</sup>, Jilles Dibangoye<sup>1</sup>, Olivier Simonin<sup>1</sup>, and Christian Wolf<sup>2</sup>

<sup>1</sup> INRIA Chroma team, CITI Lab. INSA Lyon, France.

<https://team.inria.fr/chroma/en/>

<sup>2</sup> Université de Lyon, INSA-Lyon, LIRIS, CNRS, France.

{firstname.lastname}@insa-lyon.fr

**Project page** [https://edbeeching.github.io/papers/learning\\_to\\_plan](https://edbeeching.github.io/papers/learning_to_plan)

## 1 Supplementary material

### 1.1 Example graphs

Figure 1 shows example graphs extracted from three different environments extracted with the method described in section 3.3 of the main paper.

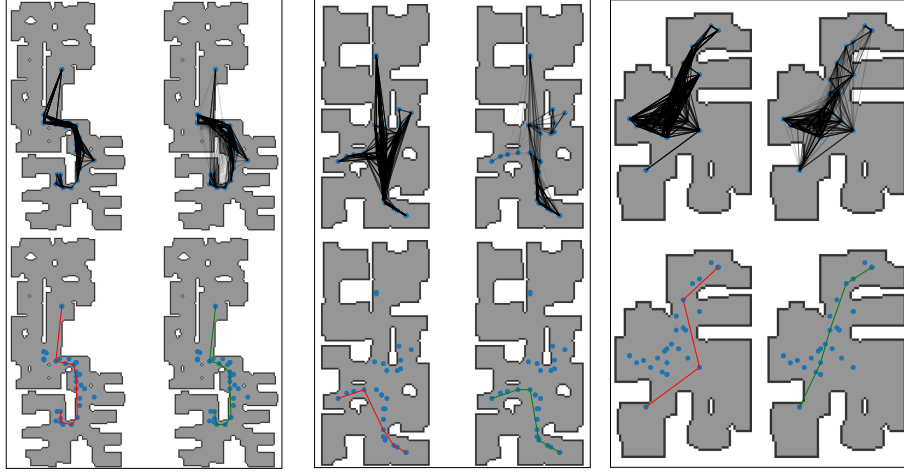

Fig. 1: Examples of top down maps and graphs from three environments. For each environment - Top-left: topological map with ground truth connectivities, top-right: topological map with connection probabilities estimated by the learned  $f_{link}$  function with line opacity corresponding to the link probability, bottom-left: ground truth shortest path between a source and target node, bottom-right: shortest path estimated by the Graph Neural Planner. Note the very bottom-right prediction connects two nodes that are not connected in the ground truth, this example would not be counted as a valid path during evaluation of the SPL metric.

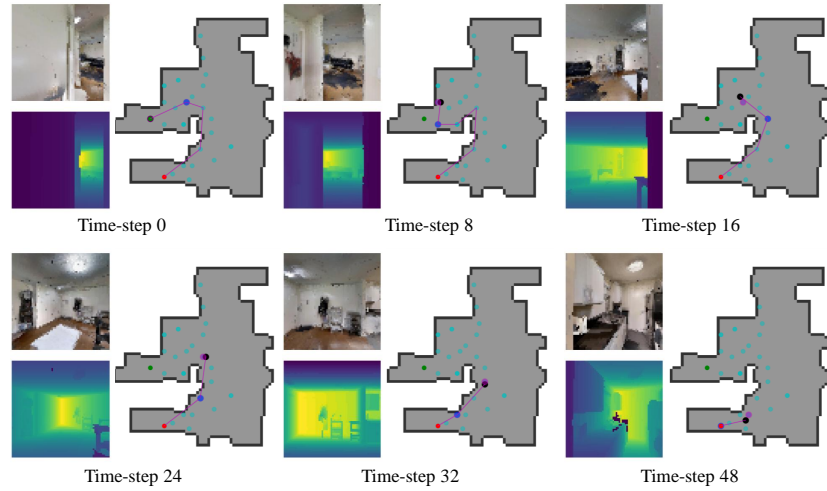

Fig. 2: Six time-steps from a rollout of the hierarchical planner (graph+local) in an unseen testing environment. For each time-step: left – RGB-D observation, right – map of the environment (unseen) with graph nodes, source node, target node, agent position(black), nearest neighbour to the agent, local point-goal provided by the high level planner and planned path.

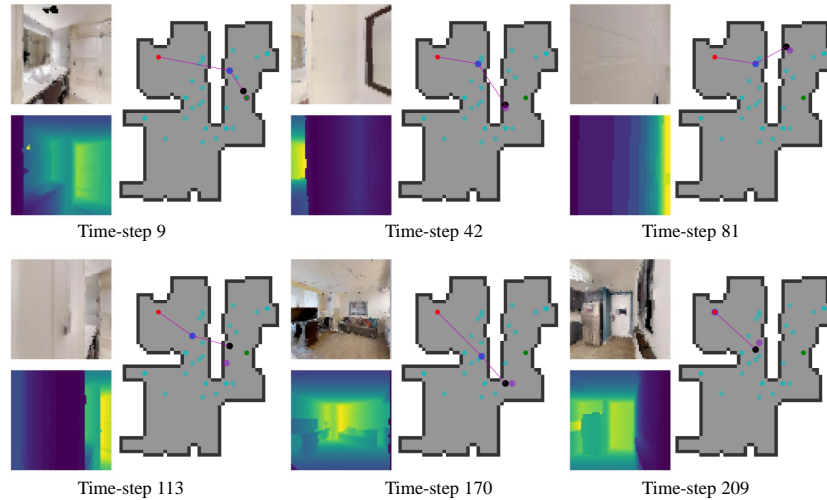

Fig. 3: Failure case - Six time-steps from a rollout of the hierarchical planner (graph+local) in an unseen testing environment. For each time-step: left – RGB-D observation, right – map of the environment (unseen) with graph nodes, source node, target node, agent position(black), nearest neighbour to the agent, local point-goal provided by the high level planner and planned path.

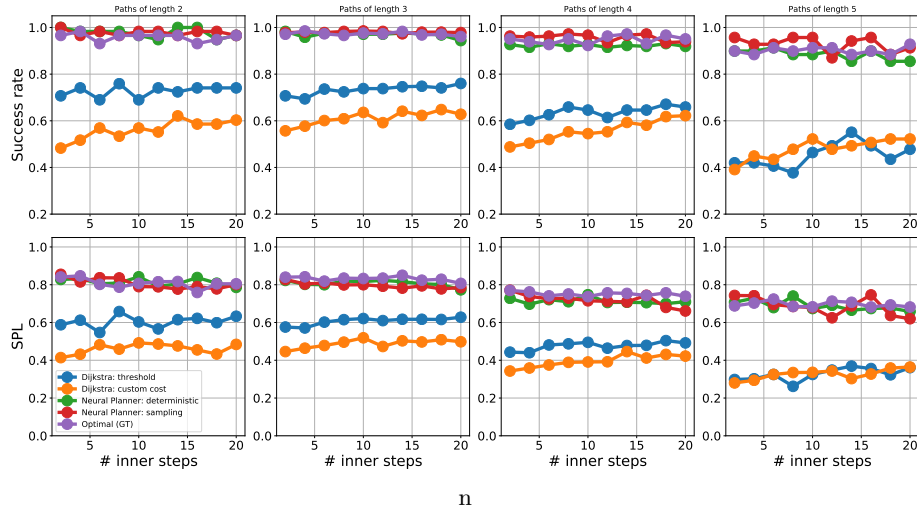

Fig. 4: Performance of the hierarchical agent with varied low level inner loop steps for a range of high-level path lengths.

## 1.2 Examples of Graph planner trajectories

Figures 2 and 3 of this document show additional rollouts of the hierarchical planner, complementary to figure 6 of the main paper.

## 1.3 Effect of the length $m$ of the local policy

In figure 4 of this document we show the effect of the parameter  $m$  of the local policy, described in section 3, page 6, of the main document, when evaluated on a limited random subset of the validation data (1,200 problem instances). The  $m$  parameter limits the maximum number of steps the local policy can take before giving control back to the high-level graph planner. We recall that the local policy can also decide to terminate the inner loop earlier through an explicit *STOP* action. We see that performance of the planner and policy is comparable up to 20 time-steps, which means the computationally costly planning step can be performed less frequently than the low level control of the local policy, without a reduction in performance.

## 1.4 Hyper-parameters

Table 1 provides the hyper-parameters for the three different neural models used in this work:

- the explorative policy used to create the graphs, trained through RL;
- the graph based high-level planner, trained in a supervised way, and
- the local policy, trained through RL.

Table 1: Hyper-parameters for the exploratory policy, node linkage function and Neural Planner

| <b>Exploratory policy and <math>F_{link}</math></b> |                                    |
|-----------------------------------------------------|------------------------------------|
| Simulator resolution                                | 64×64                              |
| optimizer                                           | Adam: betas=(0.9, 0.999), eps=1e-5 |
| learning rate                                       | 2.50e-04                           |
| weight decay                                        | 0.0                                |
| parallel agents                                     | 16                                 |
| GRU hidden size                                     | 512                                |
| Entropy coef                                        | 0.001                              |
| Advantage normalization                             | True                               |
| Generalized Advantage Estimation                    | True                               |
| Minibatch size                                      | 4 (trajectories)                   |
| PPO CLIP                                            | 0.1                                |
| num environment steps                               | 200 M                              |
| TBPTT                                               | 128                                |
| <b>Neural Planner</b>                               |                                    |
| optimizer                                           | Adam: betas=(0.9, 0.999), eps=1e-8 |
| learning rate                                       | 0.001                              |
| weight decay                                        | 0.0001                             |
| batch size                                          | 32                                 |
| num epochs                                          | 500                                |
| dataset size                                        | 36,000                             |
| GRU size                                            | 256                                |
| Feature size                                        | 512                                |
| Learning rate decay: 0.1 every 120 epochs           |                                    |
| GNN steps                                           | 6                                  |
| Multilayer GRU Depth                                | 2                                  |
| Gradient norm clipping                              | 2.0                                |
| <b>Local policy</b>                                 |                                    |
| Simulator resolution                                | 64×64                              |
| optimizer                                           | Adam: betas=(0.9, 0.999), eps=1e-8 |
| learning rate                                       | 2.50e-04                           |
| weight decay                                        | 0.0                                |
| parallel agents                                     | 16                                 |
| GRU hidden size                                     | 512                                |
| Entropy coef                                        | 0.001                              |
| Advantage normalization                             | True                               |
| Generalized Advantage Estimation                    | True                               |
| Minibatch size                                      | 4 (trajectories)                   |
| PPO CLIP                                            | 0.1                                |
| num environment steps                               | 200 M                              |
| TBPTT                                               | 128                                |
