# Supplementary material
Source: ML conference proceedings conference paper supplement (https://www.ecva.net/papers/eccv_2020/papers_ECCV/html/123480477_ECCV_2020_paper.php)
Supplement: Supplementary file 2 [file 123480477-supp.zip]

Archive with 2 entries (2 files):
- ECCV2020_Learning_to_plan_in_uncertain_topological_maps_supp_mat.pdf
- eccv2020_learning_to_plan_spotlight_final.mp4
